# Supplementary material for: Dietary Supplementation of Vine Tea Ameliorates Glucose and Lipid Metabolic Disorder via Akt Signaling Pathway in Diabetic Rats
Source: PubMed Central journal article supplement (PMC6571802; doi:10.3390/molecules24101866), 2019-05-15
Supplement: molecules-24-01866-s001.pdf [file molecules-24-01866-s001.pdf]

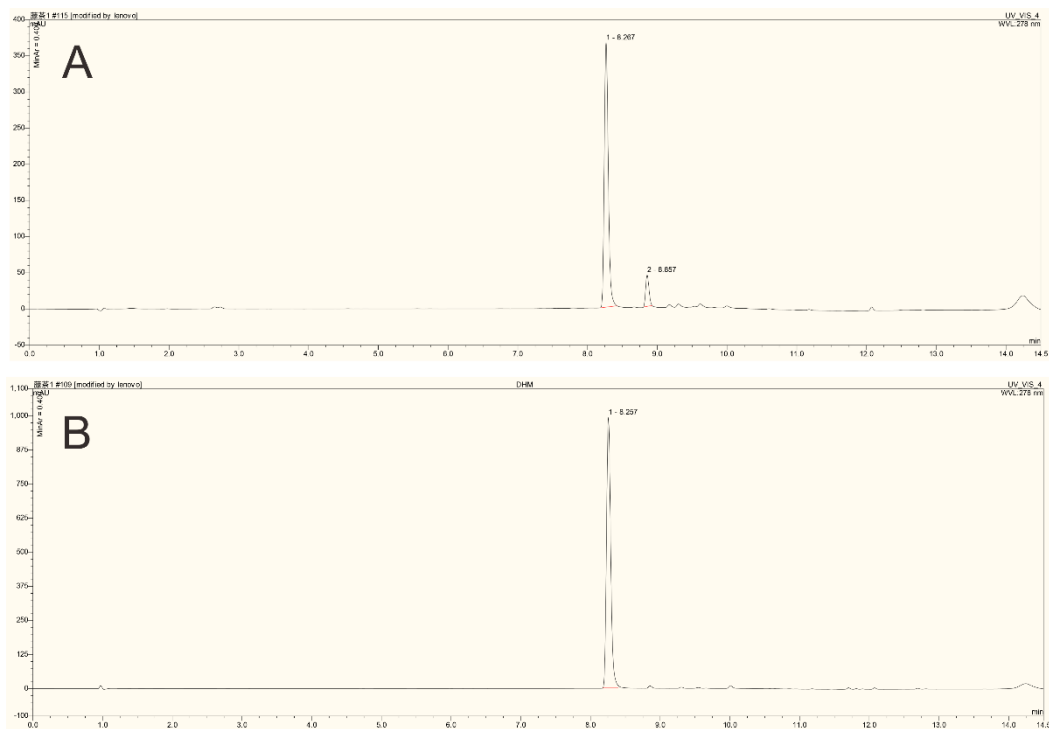

**Figure S1.** Determination of dihydromyricetin (DHM) content in VT by UPLC. Chromatogram of DHM in VT (A). Chromatogram of DHM (B).

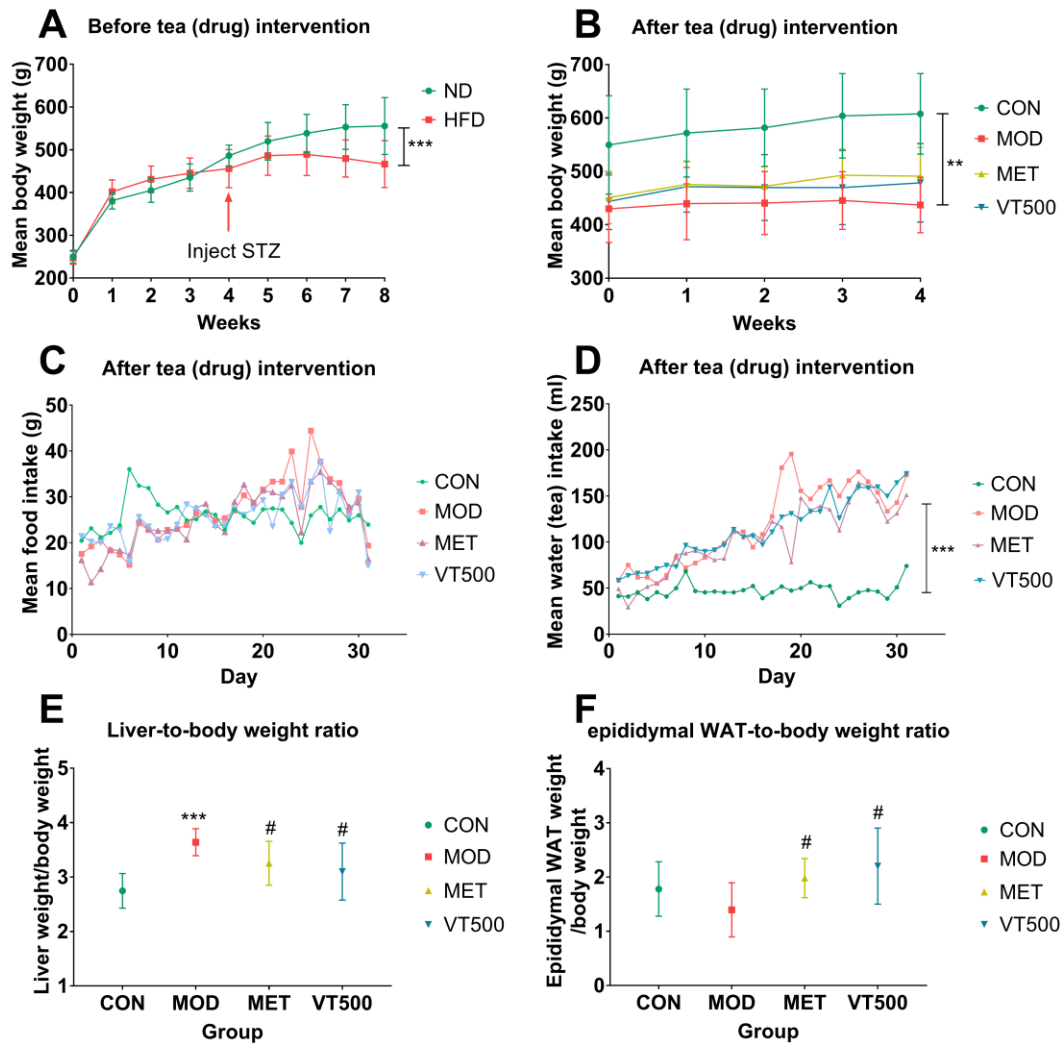

**Figure S2.** Effect of VT on the BW, FI, water (tea) intake, liver-to-BW ratio and epididymal white adipose tissue (WAT)-to-BW ratio of each group. Changes in BW during the 8-week modeling process (ND, n = 10; HFD, n = 30, **A**); changes in BW during the 4 weeks of treatment, n=6 (**B**); changes in food intake during the 4 weeks of treatment, n = 6 (**C**); changes in water (tea) intake during the 4 weeks of treatment, n=6, (**D**); liver-to-BW ratio of each group, n = 6 (**E**); epididymal WAT-to-BW ratio of each group, n = 6 (**F**). Data are presented as the mean  $\pm$  SD. \*\* P < 0.01, \*\*\* P < 0.001 compared to the CON group; # P < 0.05 compared to the MOD group.

**Table S1.** Pathway impact analyses of key hepatic metabolites ( $p < 0.05$ ) between the VT500 group and MOD group by MetaboAnalyst 4.0.

| NO. | Pathway name                                        | Total Compound | Hits | Raw p    | FDR      | Impact |
|-----|-----------------------------------------------------|----------------|------|----------|----------|--------|
| 1   | D-Glutamine and D-glutamate metabolism              | 5              | 1    | 0.001247 | 0.004208 | 1.00   |
| 2   | Alanine, aspartate and glutamate metabolism         | 24             | 1    | 0.001247 | 0.004208 | 0.26   |
| 3   | Arginine and proline metabolism                     | 44             | 1    | 0.001247 | 0.004208 | 0.09   |
| 4   | Glutathione metabolism                              | 26             | 1    | 0.001247 | 0.004208 | 0.06   |
| 5   | Histidine metabolism                                | 15             | 1    | 0.001247 | 0.004208 | 0.00   |
| 6   | Butanoate metabolism                                | 20             | 1    | 0.001247 | 0.004208 | 0.00   |
| 7   | Porphyrin and chlorophyll metabolism                | 27             | 1    | 0.001247 | 0.004208 | 0.00   |
| 8   | Nitrogen metabolism                                 | 9              | 1    | 0.001247 | 0.004208 | 0.00   |
| 9   | Sphingolipid metabolism                             | 21             | 1    | 0.002110 | 0.005698 | 0.02   |
| 10  | Glycerophospholipid metabolism                      | 30             | 1    | 0.002110 | 0.005698 | 0.00   |
| 11  | Riboflavin metabolism                               | 11             | 2    | 0.002734 | 0.006710 | 0.33   |
| 12  | Amino sugar and nucleotide sugar metabolism         | 37             | 5    | 0.004709 | 0.010594 | 0.13   |
| 13  | Galactose metabolism                                | 26             | 2    | 0.005826 | 0.012100 | 0.00   |
| 14  | Aminoacyl-tRNA biosynthesis                         | 67             | 4    | 0.008002 | 0.015432 | 0.00   |
| 15  | Purine metabolism                                   | 68             | 6    | 0.009059 | 0.016306 | 0.30   |
| 16  | Nicotinate and nicotinamide metabolism              | 13             | 3    | 0.011847 | 0.019992 | 0.17   |
| 17  | Cysteine and methionine metabolism                  | 28             | 1    | 0.014437 | 0.022929 | 0.09   |
| 18  | Pantothenate and CoA biosynthesis                   | 15             | 1    | 0.016330 | 0.024495 | 0.02   |
| 19  | Glycine, serine and threonine metabolism            | 32             | 1    | 0.020004 | 0.027522 | 0.00   |
| 20  | Phenylalanine, tyrosine and tryptophan biosynthesis | 4              | 1    | 0.023445 | 0.027522 | 0.50   |
| 21  | Tyrosine metabolism                                 | 42             | 1    | 0.023445 | 0.027522 | 0.14   |
| 22  | Ubiquinone and other terpenoid-quinone biosynthesis | 3              | 1    | 0.023445 | 0.027522 | 0.00   |
| 23  | Phenylalanine metabolism                            | 9              | 1    | 0.023445 | 0.027522 | 0.00   |
| 24  | Pyrimidine metabolism                               | 41             | 1    | 0.038229 | 0.043008 | 0.07   |

|    |                                          |    |   |          |          |      |
|----|------------------------------------------|----|---|----------|----------|------|
| 25 | Pentose and glucuronate interconversions | 14 | 2 | 0.044200 | 0.044200 | 0.64 |
| 26 | Ascorbate and aldarate metabolism        | 9  | 2 | 0.044200 | 0.044200 | 0.40 |
| 27 | Starch and sucrose metabolism            | 23 | 2 | 0.044200 | 0.044200 | 0.24 |

---
